# Supplementary material for: Synthesis and self-assembly of the amphiphilic homopolymers poly(4-hydroxystyrene) and poly(4-(4-bromophenyloxy)styrene)
Source: Royal Society of Chemistry journal article supplement (doi:10.1039/d3py01124k), 2024-01-01
Supplement: d3py01124k1.pdf [file d3py01124k1.pdf]

## Supporting Information

# Synthesis and Self-Assembly of the Amphiphilic Homopolymers Poly(4-hydroxystyrene) and Poly(4- (4-bromophenyloxy)styrene)

*Christopher M. Hurley<sup>a</sup>, Mohammad Changez<sup>b\*</sup>, Megan H. Johnstone<sup>c</sup>, Mohammad Faiyaz*

*Anwar<sup>d</sup>, Hilal Alrahbi<sup>b</sup>, Dallas Donohoe<sup>c</sup>, Nam-Goo Kang<sup>a\*</sup>, Jimmy Mays<sup>a</sup>*

*<sup>a</sup> Department of Chemistry, University of Tennessee, Knoxville, TN 37996, USA, email:  
papyrus92@gmail.com*

*<sup>b</sup> College of Health Sciences, University of Buraimi, Buraimi, Oman, email:  
mchangez@uob.edu.om*

*<sup>c</sup> Department of Nutrition, University of Tennessee, Knoxville, TN 37996, USA*

*<sup>d</sup> Department of Pathology, All Indian Institute of Medical Sciences, Ansari Nager, New  
Delhi, India*

*\*Corresponding authors*

**Process for Au nanoparticle synthesis**

The formation of gold nanoparticle suspensions in polymer vesicles was conducted by first introducing  $\text{HAuCl}_4$  into the polymer vesicles solutions (mole ratio of phenolic OH: $\text{Au}^{+++}$  is 1.00:0.25) for several hours before reducing the gold in solution by reaction with hydrazine. The presence of gold nanoparticles was confirmed by UV-vis spectrophotometry measurements showing strong absorbance corresponding to the known absorbance band of gold nanoparticles between 540 nm and 600 nm.

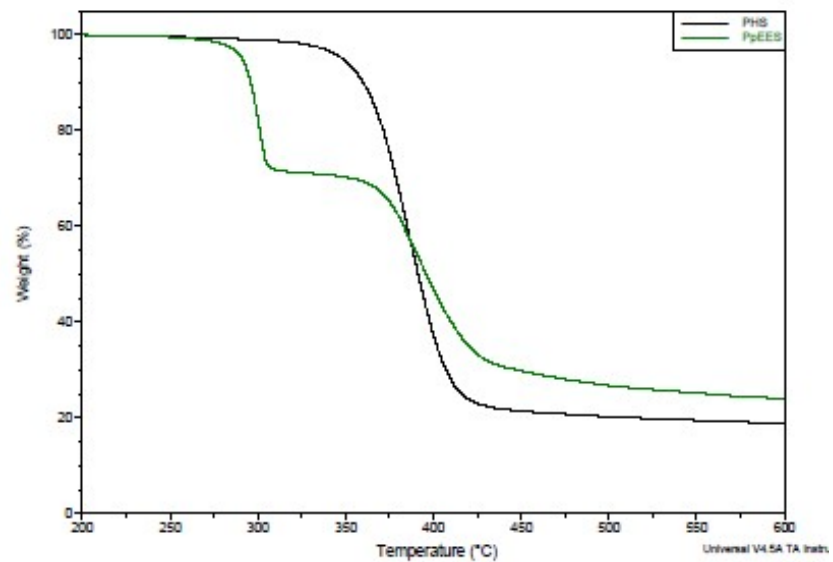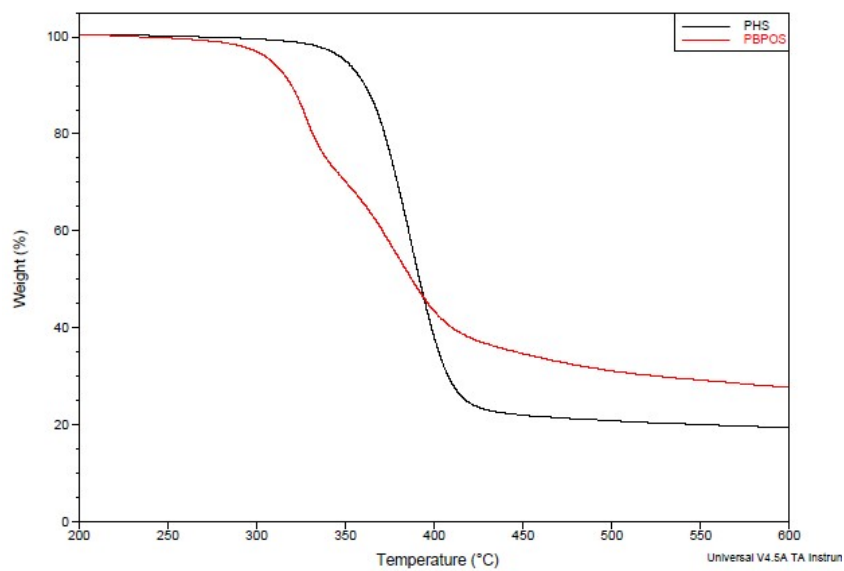

**Fig. S1** TGA thermal decomposing curves of PpEES vs. PHS (top) and PBPOS vs PHS (bottom).

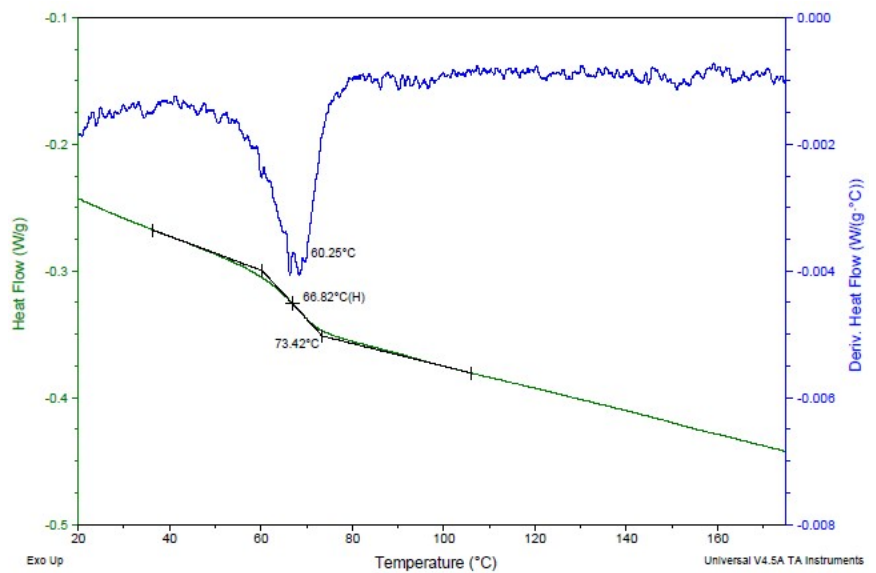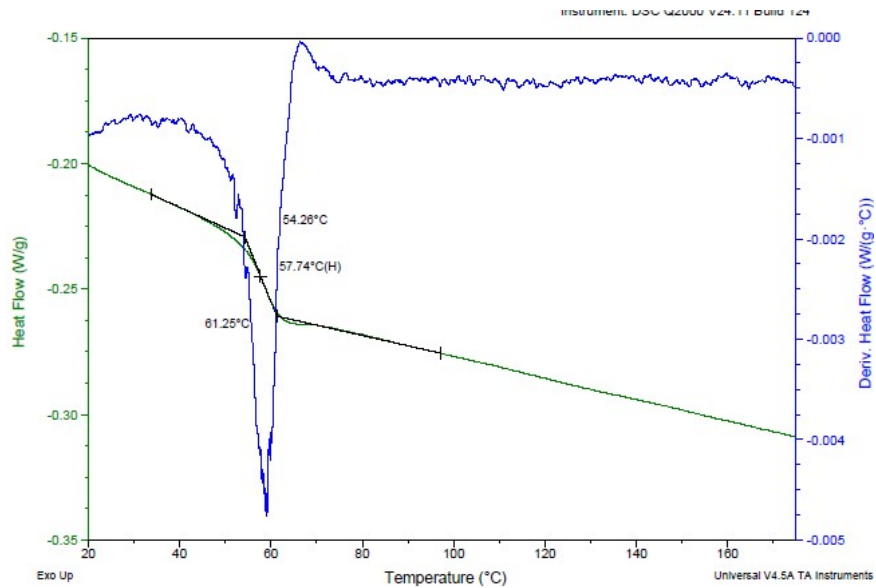

**Fig. S2** DSC curves of poly(4-(4-bromophenoxy)styrene)

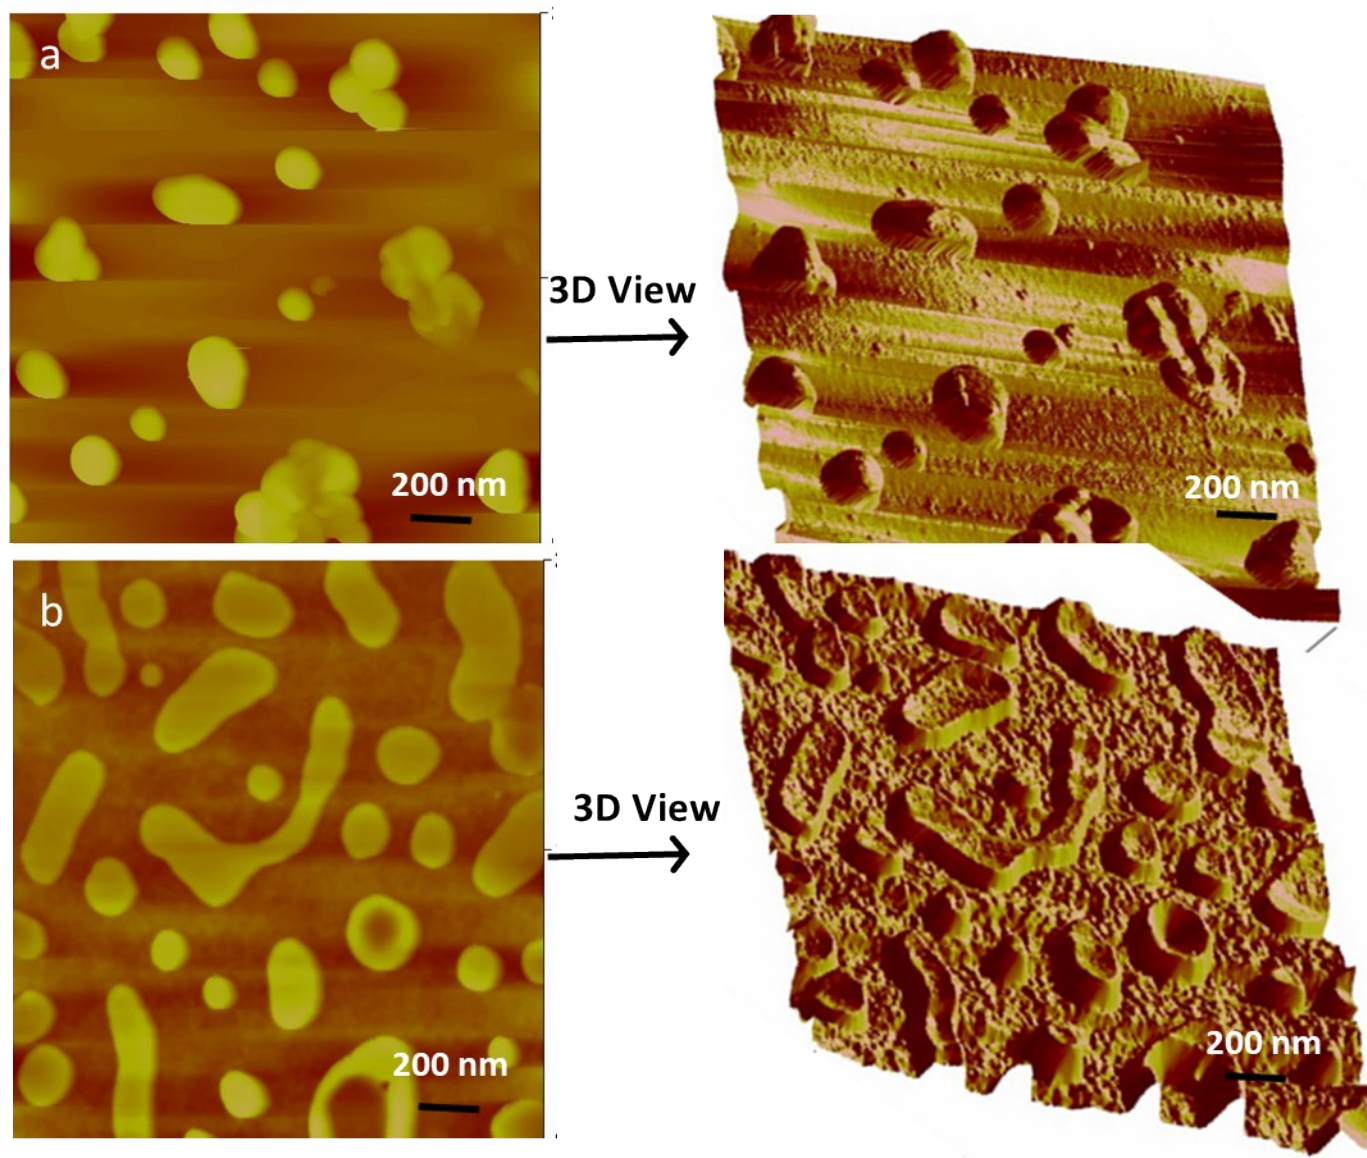

**Fig. S3** Atomic force microscope height micrographs of poly (4-hydroxystyrene) (PHS), ( $M_n = 9400$  g/mole, run 4 (Table 1) (a) in a mixed solvent of water: THF (70:30, v/v), and (b) in a mixed solvent of water: THF (50:50, v/v).

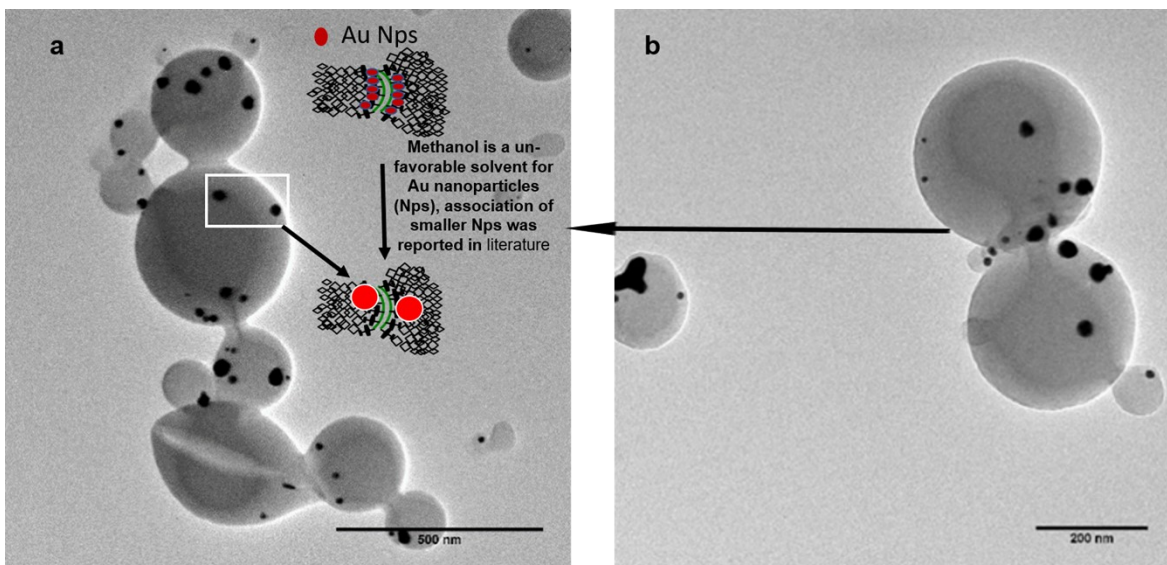

**Fig. S4** TEM Images of poly(4-hydroxystyrene) in the 70:30 mixed solvent of water and methanol (v/v) with gold nanoparticles.

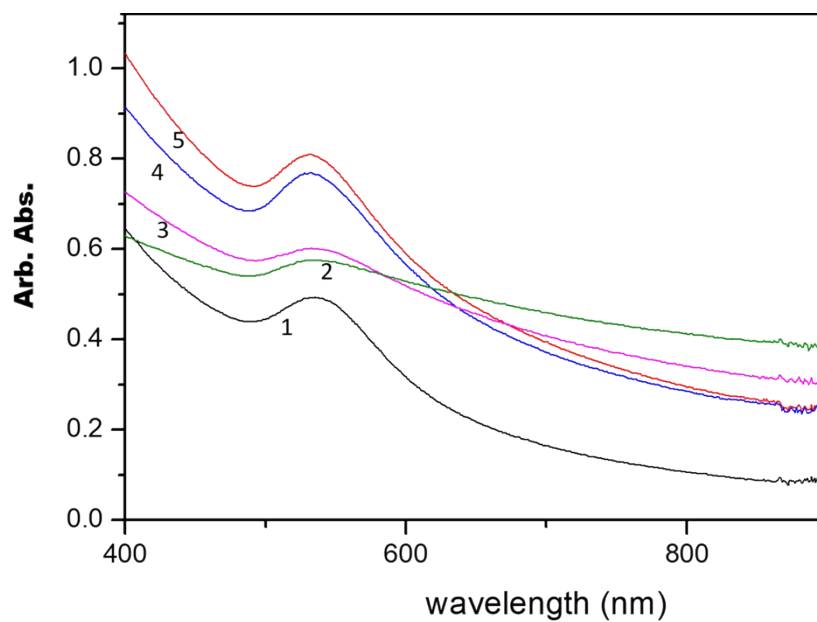

**Fig. S5** UV-vis spectra of gold nanoparticle colloid suspensions with molar ratios of PHS to Au precursor ranging from 1.0:0.1 (spectra 1), 1.0:0.2 (spectra 2), 1.0:0.3 (spectra 3), 1.0:0.4 (spectra 4), and 1.0:0.5 (spectra 5), in mixed solvent of water and methanol (70:30 v/v).

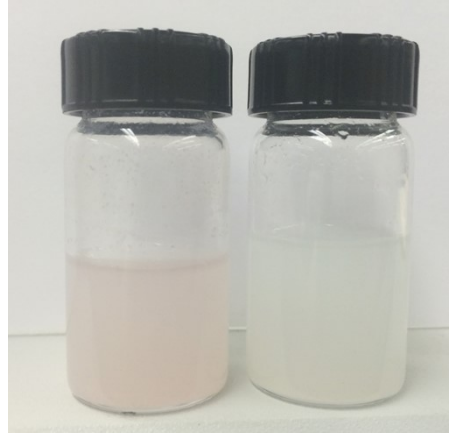

**Fig. S6** Solution of PHS in DI water with Doxorubicin encapsulated (left), solution of PHS without Doxorubicin (right).



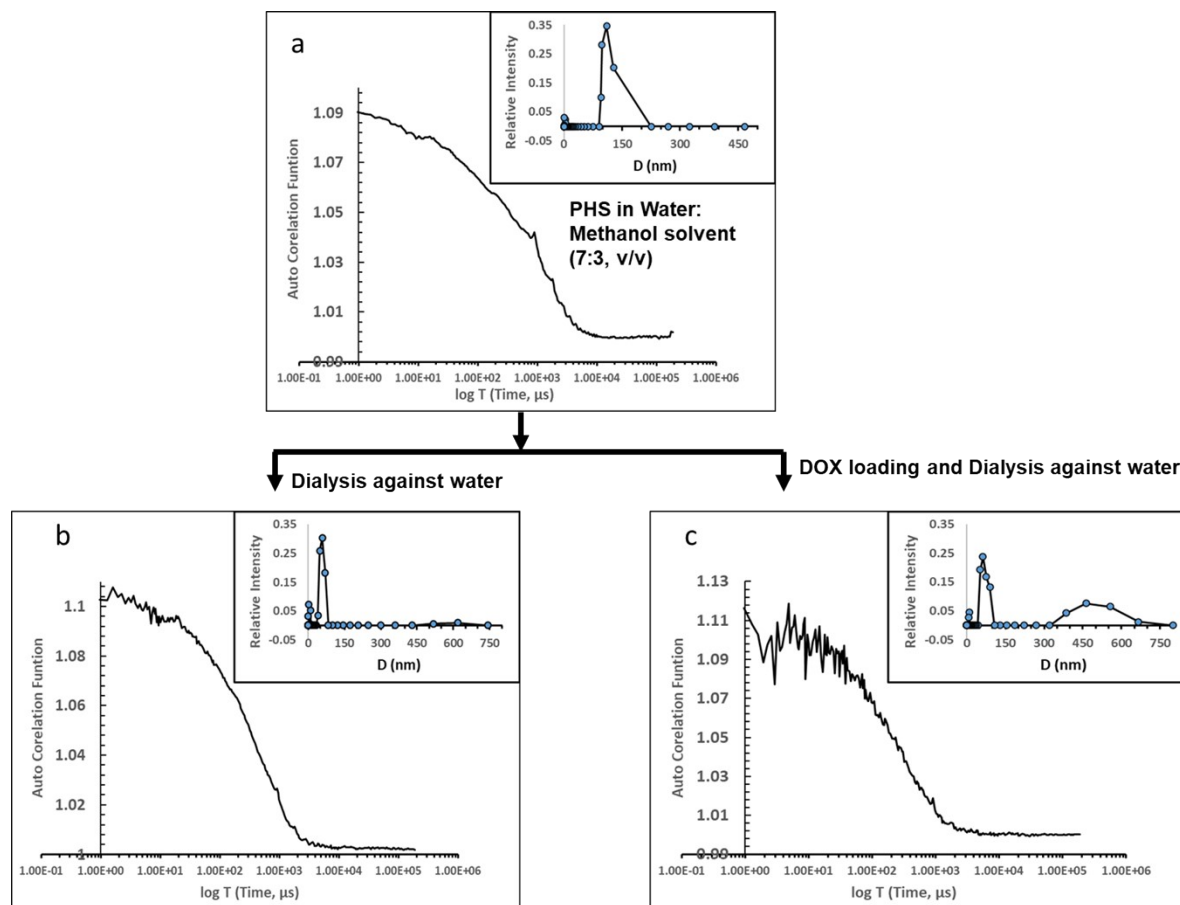

**Fig. S7** Dynamic light scattering (DLS) autocorrelation and size distribution of poly(4-hydroxy styrene) vesicles in (a) water: methanol ( 70:30, v/v) without dialysis, (b) after dialysis with water, and (c) doxorubicin loaded vesicles after dialysis with water.

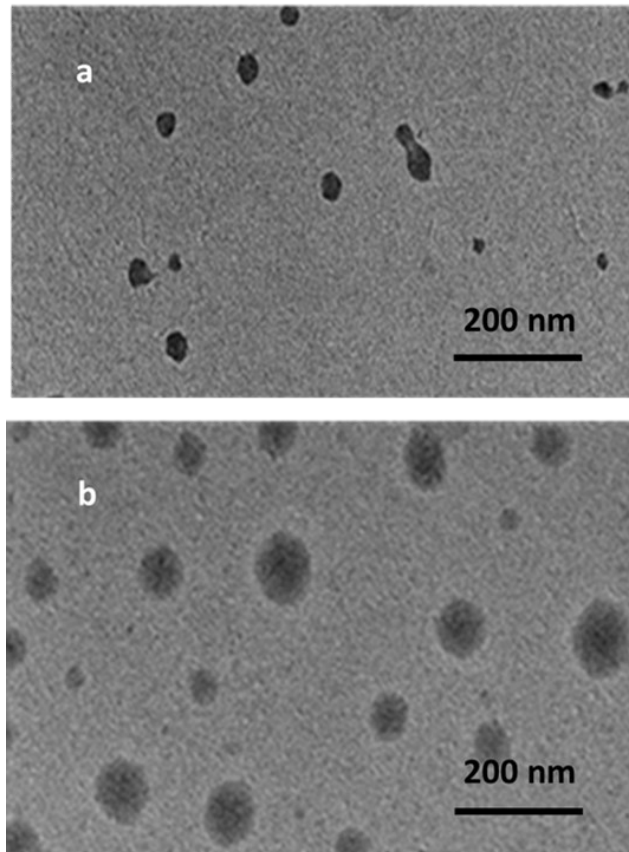

**Fig. S8** TEM micrograph of poly(4-hydroxy styrene) vesicles (water : methanol: 70:30, v/v) after dialysis with water (a) without doxorubicin loaded vesicles and (b) doxorubicin loaded vesicles.

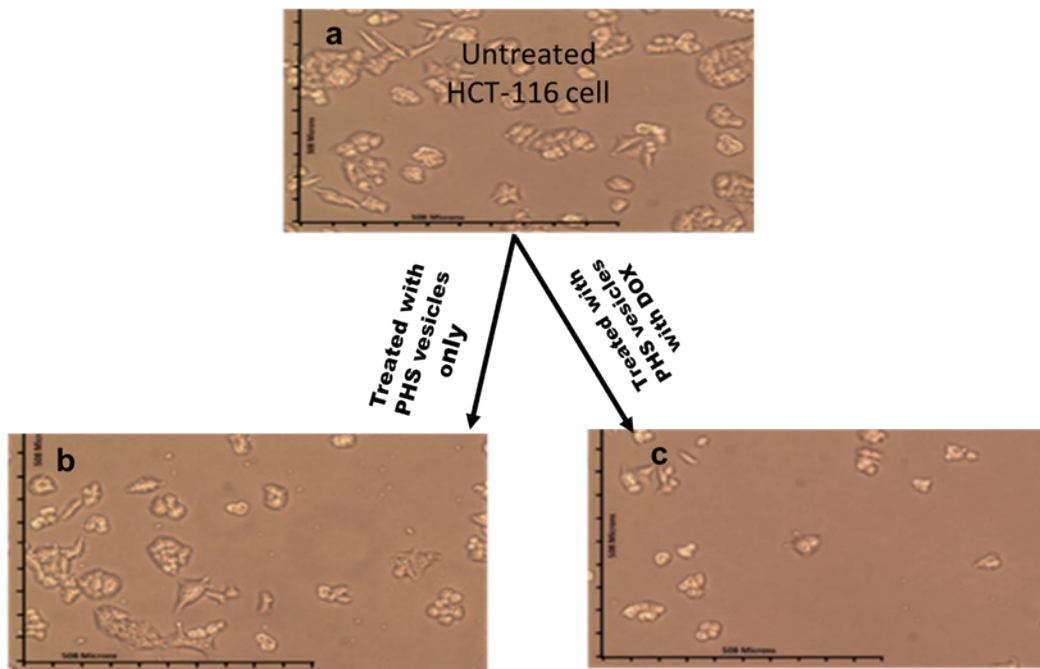

**Fig. S9** Optical micrograph after 24 hours of (a) untreated cells, (b) empty PHS vesicle-treated cells, and (c) DOX-loaded PHS vesicle-treated cells.
